# Supplementary material for: A multicolor biosensor for alkaline phosphatase activity detection based on the peroxidase activity of copper nanoclusters and etching of gold nanorods
Source: Royal Society of Chemistry journal article supplement (doi:10.1039/d2an00517d), 2022-01-01
Supplement: d2an00517d1.pdf [file d2an00517d1.pdf]

# Supporting Information

1  
2  
3  
4  
5  
6  
7  
8  
9  
10  
11  
12  
13  
14  
15  
16  
17  
18  
19  
20  
21  
22  
23

## **Multicolor biosensor for alkaline phosphatase activity detection based on peroxidase activity of copper nanoclusters and etching of gold nanorods**

*Qin Luo<sup>a</sup>, Yisheng Lin<sup>a</sup>, Qihong Cai<sup>b</sup>, Fang Luo<sup>a</sup>, Cuiying Lin<sup>a,\*</sup>, Jian Wang<sup>a</sup>, Bin  
Qiu<sup>a</sup>, Zhenyu Lin<sup>a,\*</sup>*

*<sup>a</sup> Ministry of Education Key Laboratory for Analytical Science of Food Safety and  
Biology, Fujian Provincial Key Laboratory of Analysis and Detection for Food Safety,  
College of Chemistry, Fuzhou University, Fuzhou, Fujian, 350116, China.*

*<sup>b</sup>  
pharmaceutical and Medical Technology College of Putian University, Putian, Fujian,  
China*

**Corresponding author:** Cuiying Lin, Zhenyu Lin

**E-mail:** lcuiying@fzu.edu.cn (Cuiying Lin)

zylin@fzu.edu.cn (Zhenyu Lin); Tel&Fax: 86-591-22866135

**Address:**

Department of Chemistry, Fuzhou University, Fuzhou, Fujian, 350116, China

## 1 **1. Reagents and instruments**

2 Bovine serum albumin (BSA) was purchased from Shanghai Shenggong  
3 Biological Engineering Co., Ltd. Alkaline phosphatase (ALP) was purchased from  
4 Shanghai Yuanye Biotechnology Co., Ltd. 3,3',5,5'-Tetramethylbenzidine (TMB),  
5 cetyltrimethylammonium bromide (CTAB), chloroauric acid ( $\text{HAuCl}_4$ ), copper sulfate  
6 ( $\text{CuSO}_4$ ), ascorbic acid (AA) were purchased from Tianjin Fuchen Chemical  
7 Reagent Co., Ltd. Silver nitrate ( $\text{AgNO}_3$ ) and sodium borohydride ( $\text{NaBH}_4$ ) and were  
8 purchased from Sinopharm Chemical Reagent Co., Ltd. All reagents are of analytical  
9 grade. All related solutions were prepared with deionized water obtained by DirectQ3  
10 UV system (equipment purchased from Merck Millipore, Germany, conductivity 18.2  
11  $\text{M}\Omega/\text{cm}$ ). The UV-Vis absorption spectrum was obtained by Multiskan GO full-  
12 wavelength microplate reader from Thermo Fisher Scientific. A Nicolet iS50 FT-IR  
13 system (Thermo Fisher, USA) was used to scan Fourier Transform Infrared  
14 Spectroscopy (FT-IR).

15

## 16 **2. Preparation of AuNRs**<sup>1,2</sup>

17 AuNRs are synthesized briefly by seed growth methods, including the synthesis  
18 of gold seeds and the growth of AuNRs. The preparation method of gold seed solution  
19 is as follows:  $\text{NaBH}_4$  was dissolved in ice water to reduce  $\text{HAuCl}_4$  to prepare gold  
20 seeds.  $\text{HAuCl}_4$  solution (0.25 mL, 0.01 mol/L), CTAB solution (1 mL, 0.2 mol/L) and  
21 4.75 mL water were mixed in small glass bottles, and stirred at 1200 r/min for 20 s.  
22 The solution changed from yellow to dark brown, and the solution was left for 30 min  
23 to age the prepared gold seeds.

24 Preparation of growth solution: CTAB solution (12.5 mL, 0.2 mol/L), 9.675 mL  
25 deionized water,  $\text{AgNO}_3$  solution (0.15 mL, 0.01 mol/L) and  $\text{HAuCl}_4$  (1 mL, 0.01  
26 mol/L) were put in a round-bottom flask, stirred and mixed. Then, ascorbic acid (1.6  
27 mL, 0.01 mol/L) was added to the mixed solution, and the solution quickly became  
28 colorless. Finally, 0.05 mL of the newly prepared seed solution was added to the  
29 growth solution, which was stirred vigorously for 20 s and then stood for 24 h to wait  
30 for the growth of the AuNRs.

1 The prepared solution was centrifuged at 8000 r/min for 10 min and washed  
2 three times with water, and then centrifuged AuNRs were dissolved in an appropriate  
3 volume of CTAB solution (0.06 mol/L) for later use.

4

### 5 3. Characterization of AuNRs

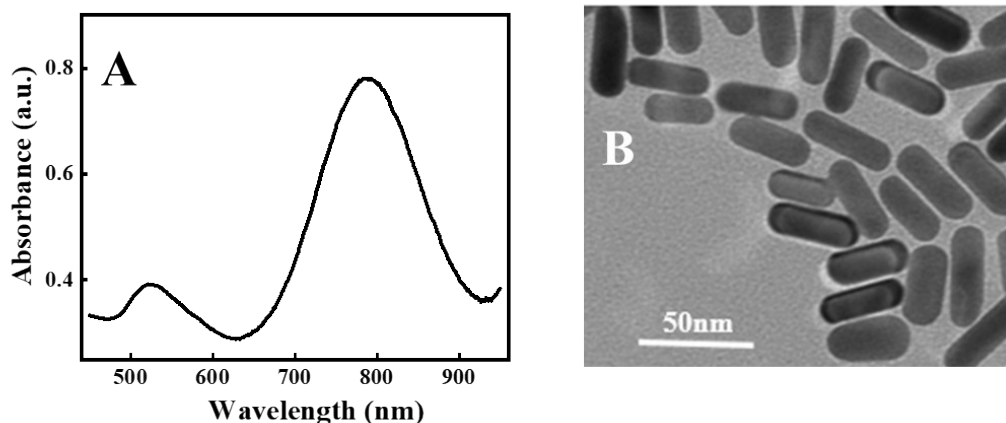

6 Fig. S1 (A) UV-visible absorption spectrum of AuNRs. (B) TEM image of  
7 AuNRs.

8

### 9 4. Preparation of CuNCs<sup>3</sup>

10 CuNCs were synthesized by reported methods<sup>3</sup>. Briefly, CuSO<sub>4</sub> aqueous solution  
11 (1 mL, 20 mmol/L) was added to the BSA solution (5 mL, 15 mg/mL) and stirred  
12 vigorously at room temperature for 5min, then NaOH solution (0.6 mL, 100 mmol/L)  
13 was added to the above solution. The resulting mixture was stirred at 55 °C for 8h,  
14 and then the solution was dialyzed in deionized water with a 3 KDa dialysis bag for  
15 48h to remove the unreacted Cu<sup>2+</sup>. The synthesized copper nanoclusters were stored  
16 in a 4 °C refrigerator.

17

18

19

20

21

22

23

24

1

2 **References**

3 1. C.-K. Tsung, X. Kou, Q. Shi, J. Zhang, M. H. Yeung, J. Wang and G. D. Stucky,  
4 *J. Am. Chem. Soc.*, 2006, **128**, 5352-5353.

5 2. Y. Lin, M. Zhao, Y. Guo, X. Ma, F. Luo, L. Guo, B. Qiu, G. Chen and Z. Lin, *Sci.*  
6 *Rep.*, 2016, **6**, 37879.

7 3. L. Hu, Y. Yuan, L. Zhang, J. Zhao, S. Majeed and G. Xu, *Anal. Chim. Acta*, 2013,  
8 **762**, 83-86.

9

10
